# Supplementary material
Source: PubMed Central journal article supplement (PMC9975033)
Supplement: NIHMS1864937-supplement-Supplementary_Figures.pdf [file NIHMS1864937-supplement-Supplementary_Figures.pdf]

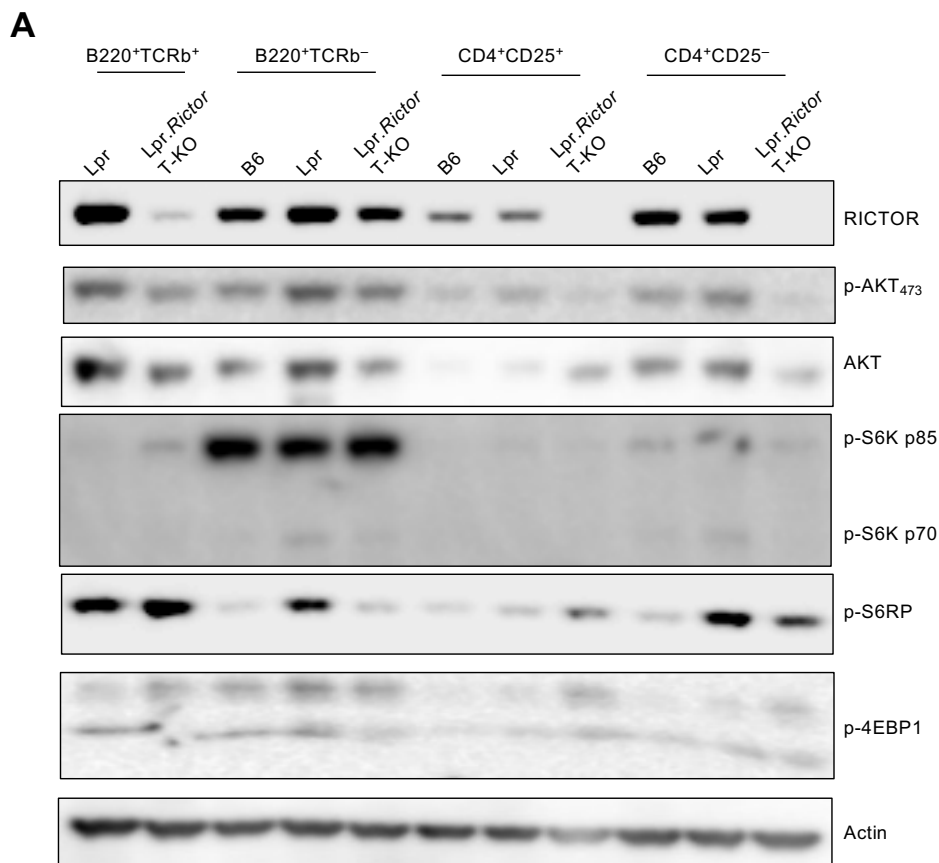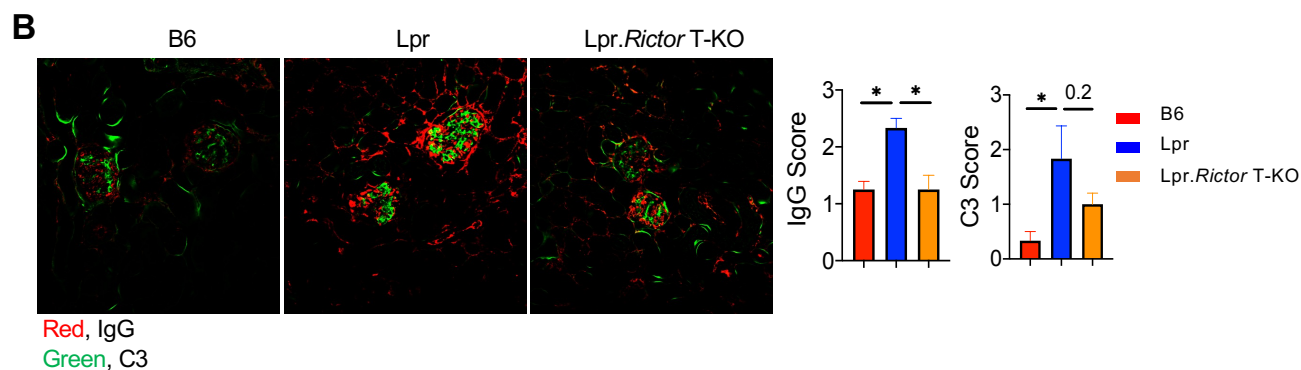

### Supplemental Figure 1

(A) Expression of RICTOR, p-AKT(S473), total AKT, p-S6K, pS6RP, p-4EBP1 and actin in flow sorted B220<sup>+</sup>TCRb<sup>+</sup>, B220<sup>+</sup>TCRb<sup>-</sup>, CD4<sup>+</sup>CD25<sup>+</sup>, and CD4<sup>+</sup>CD25<sup>-</sup> cells was examined by immunoblot. (B) Immunofluorescence staining of IgG (Red) and C3 (Green) on mice kidney sections. Right, the scores of IgG and C3 deposition. \*  $P < 0.05$  (one-way ANOVA). Results represent 3 (A), or were pooled from 2 (B), independent experiments. Error bars represent SEM.

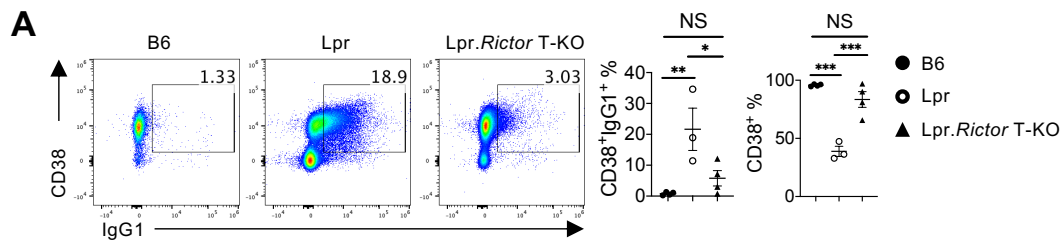

## Supplemental Figure 2

(A) Expression of CD38 and IgG1 expression on B220<sup>+</sup>TCRb<sup>-</sup> B cells. Right, the frequencies of CD38<sup>+</sup>IgG1<sup>+</sup> B cells (left) and CD38<sup>+</sup> percentages (right). (NS, not significant; \*  $P < 0.05$ , \*\*  $P < 0.01$ , \*\*\*  $P < 0.001$ , \*\*\*\*  $P < 0.0001$ , one-way ANOVA, Results were pooled from 3 independent experiments. Error bars represent SEM.

**A**

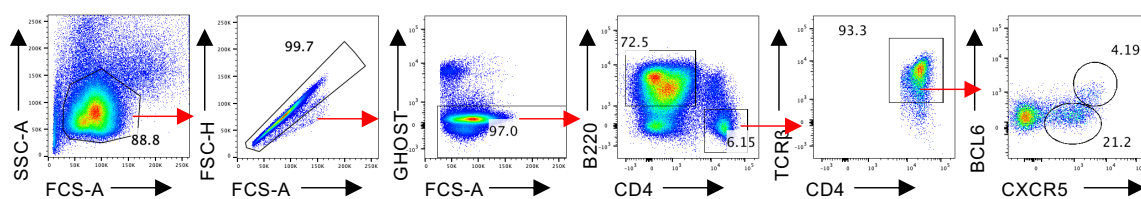

**B**

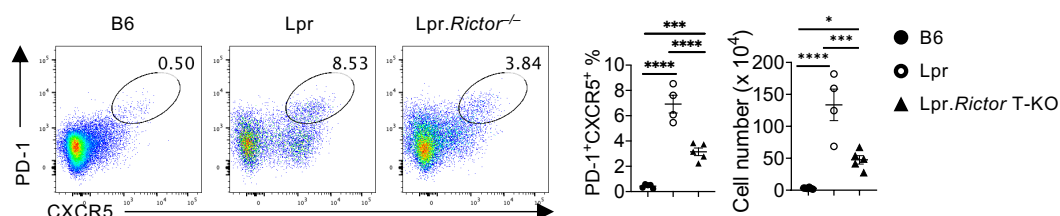

**C**

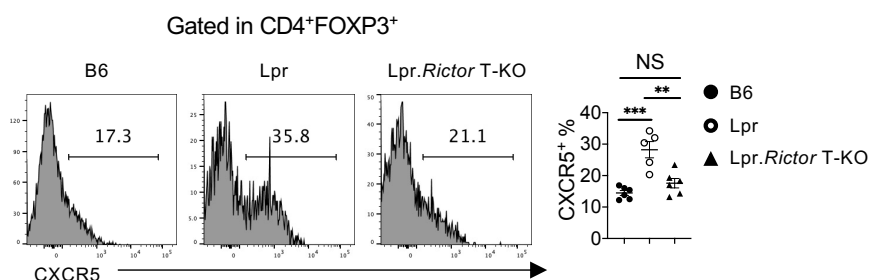

**D**

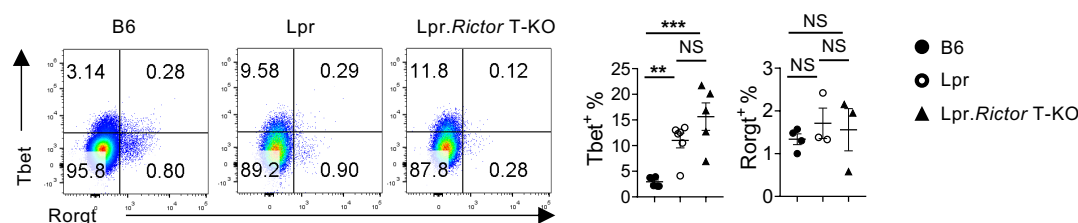

### Supplemental Figure 3

(A) Gating strategy for analysis of Tfh cells. (B) Flow cytometry analysis of CXCR5 and PD-1 on B220<sup>-</sup>CD4<sup>+</sup> T cells. Right, the percentages of PD-1<sup>+</sup>CXCR5<sup>+</sup> cells. (C) Expression of CXCR5 in Tregs. Right, summary of CXCR5<sup>+</sup> Tfr cell percentages. (D) Expression of CD25 on FOXP3<sup>+</sup> Tregs. Numbers indicate the percentages of CD25<sup>-</sup> Tregs. Right, summary of the percentages of CD25<sup>-</sup> Tregs. (F) Expression of Tbet and Rorgt on B220<sup>-</sup>CD4<sup>+</sup> T cells. Right, summary of Tbet<sup>+</sup> and Rorgt<sup>+</sup> cell percentages. Cells were from peripheral lymph nodes (pLNs) of 6 months old B6, Lpr and Lpr.Rictor T-KO mice. NS, not significant; \*\*  $P < 0.01$ , \*\*\*  $P < 0.001$ , \*\*\*\*  $P < 0.0001$  (one-way ANOVA). Results were pooled from at least 3 independent experiments. Error bars represent SEM.

**A**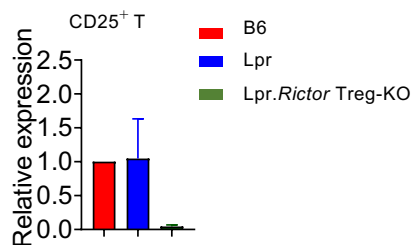**B**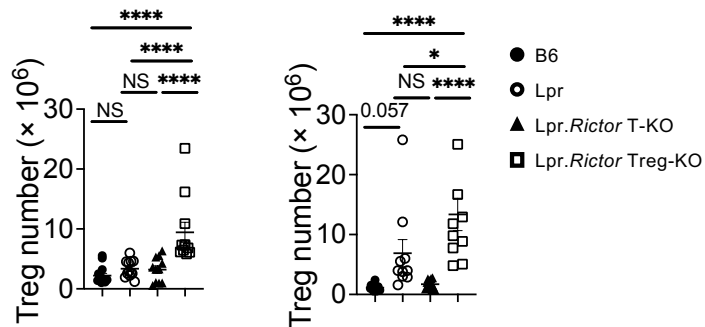**Supplemental Figure 4**

(A) Expression of *Rictor* in sorted CD25<sup>+</sup> CD4<sup>+</sup> T cells from B6, Lpr, and Lpr.*Rictor* Treg-KO mice. (B) Absolute numbers of Tregs in spleens (left) and pLN (right) from B6, Lpr, and Lpr.*Rictor* Treg-KO mice at 6 months old. Data represent 2 (A) or pooled from at least 3 (B) independent experiments.

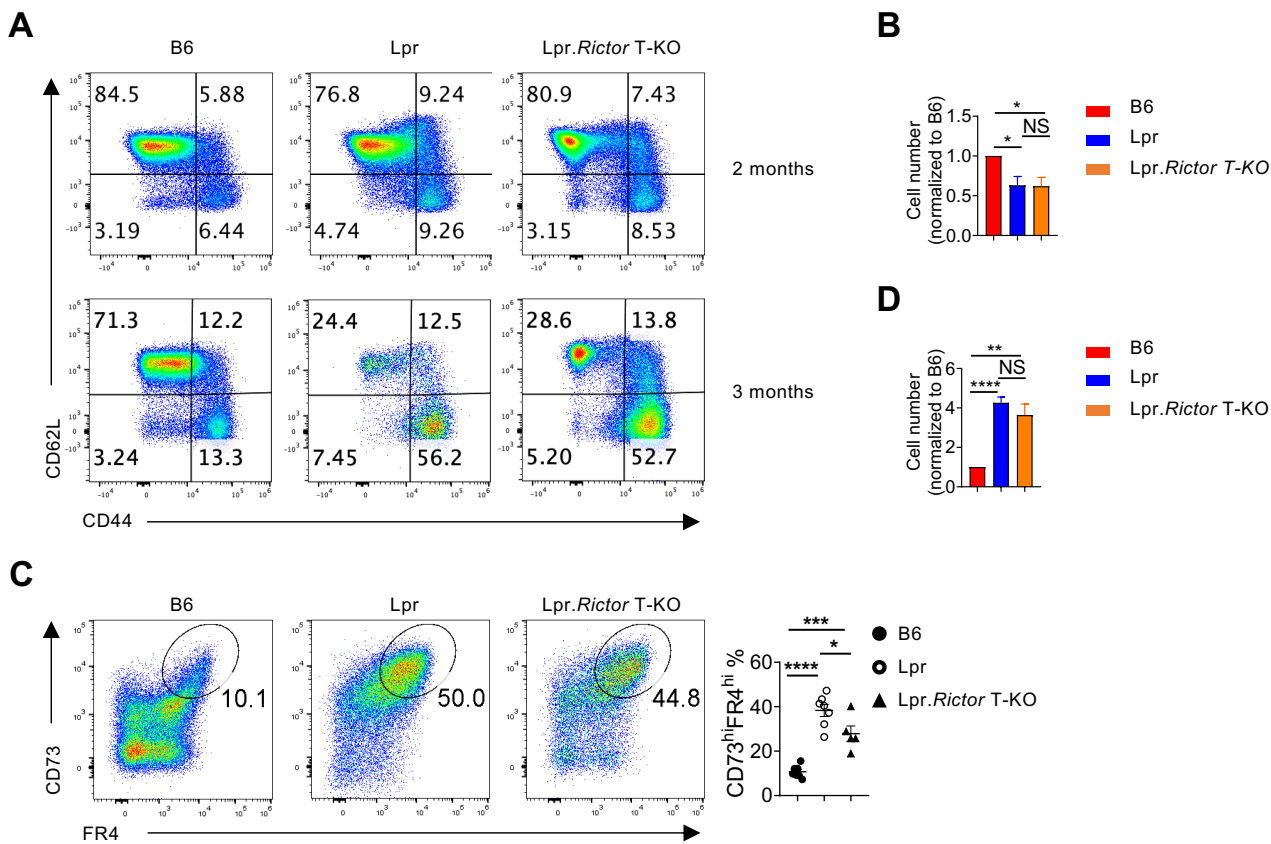

### Supplemental Figure 5

(A) Flow cytometry analysis of CD44 vs. CD62L in B220<sup>+</sup>CD4<sup>+</sup> T cells among 2 and 3 months old B6, Lpr and Lpr.*Rictor* T-KO mice, respectively. (B) Summary of cell numbers for B220<sup>+</sup>CD4<sup>+</sup> T cells with anti-CD3/anti-CD28 activation for 72 hours. Numbers were normalized to B6 control. (C) Flow cytometry analysis of CD73 vs. FR4 expression in B220<sup>+</sup>CD4<sup>+</sup> T cells among 6 months old B6, Lpr and Lpr.*Rictor* T-KO mice. Right, summaries of frequencies of CD73<sup>hi</sup>FR4<sup>hi</sup> populations. (D) Summary of cell numbers for B220<sup>+</sup>CD4<sup>+</sup> T cells activated with anti-CD3/anti-CD28, and then with secondary anti-CD3/ICOS stimulation. Numbers were normalized to B6 control. NS, not significant; \*  $P < 0.05$ , \*\*  $P < 0.01$ , \*\*\*  $P < 0.001$ , \*\*\*\*  $P < 0.0001$  (one-way ANOVA). Results were pooled from at least 3 independent experiments. Error bars represent SEM.

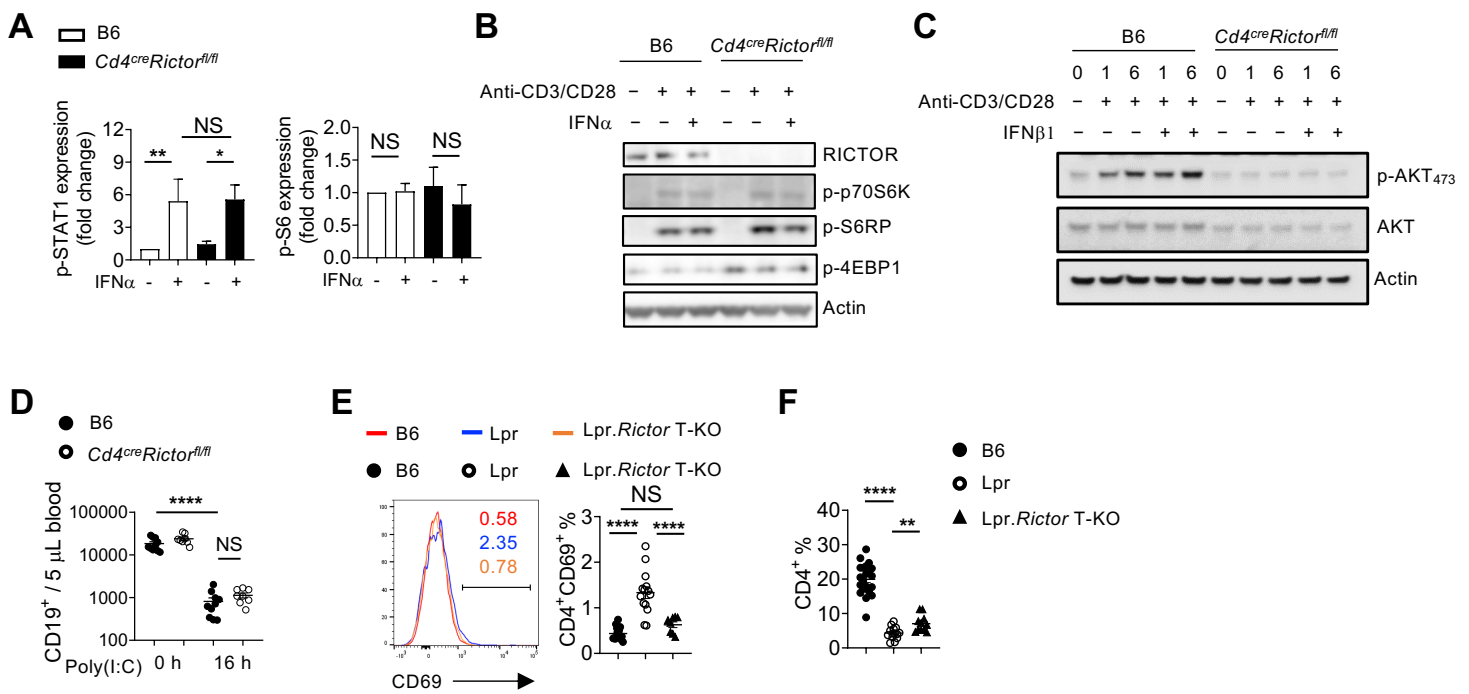

## Supplemental Figure 6

(A) Immunoblot analysis of p-STAT1 and p-S6 expression in CD4<sup>+</sup> T cells from B6 and *Cd4<sup>cre</sup>Rictor<sup>fl/fl</sup>* mice treated with or without IFN $\alpha$  in presence of anti-CD3/anti-CD28 for 6 hours. The relative expressions were normalized to them in B6 CD4<sup>+</sup> T cells without any stimulation. (B) Immunoblot analysis of RICTOR, p-p70S6K, p-S6RP, p-4EBP1 and Actin in CD4 T cells from B6 and *Cd4<sup>cre</sup>Rictor<sup>fl/fl</sup>* mice activated with anti-CD3/anti-CD28 in the presence or absence of IFN $\alpha$ . (C) Immunoblot analysis of p-AKT473, p-STAT1 and Actin in CD4 T cells from B6 and *Cd4<sup>cre</sup>Rictor<sup>fl/fl</sup>* mice activated with anti-CD3/anti-CD28 in the presence or absence of IFN $\beta$ . (D) Blood CD19<sup>+</sup> B cell counts were determined before and after poly(I:C) treatment in B6 and *Cd4<sup>cre</sup>Rictor<sup>fl/fl</sup>* mice. (E) Expression of CD69 was measured by flow cytometry in blood CD4<sup>+</sup> T cells from 4-6 months old B6, Lpr and Lpr.*Rictor* T-KO mice. Right, summary of CD69<sup>+</sup> percentages among blood CD4<sup>+</sup> T cells. (F) Percentages of CD19<sup>+</sup>CD4<sup>+</sup> T cells in blood from B6, Lpr and Lpr.*Rictor* T-KO mice among total lymphocytes. NS, not significant; \*  $P < 0.05$ , \*\*  $P < 0.01$ , \*\*\*  $P < 0.001$ , \*\*\*\*  $P < 0.0001$  (A, unpaired Student's  $t$  test, C-E, one-way ANOVA). Results represent, or were pooled from, at least 3 independent experiments. Error bars represent SEM.
